# Supplementary material for: Identifying HIV-1 Transmission Clusters in Uzbekistan through Analysis of Molecular Surveillance Data
Source: MDPI journal article supplement (doi:10.3390/v14081675), 2022-07-29
Supplement: s1 [file s1]

**Figure S1.** General characteristics of HIV-1 infected patients from Uzbekistan stratified by subtypes.

| Characteristic <sup>1</sup>              | Subtype CRF02_AG,<br>N (%) | Sub-subtype A6,<br>N (%) | P value <sup>2</sup> |
|------------------------------------------|----------------------------|--------------------------|----------------------|
| <b>Age (years)</b>                       |                            |                          | 0.114                |
| <25                                      | 29 (15.4)                  | 9 (8.0)                  |                      |
| 25-35                                    | 63 (33.3)                  | 32 (28.3)                |                      |
| 35-45                                    | 69 (36.5)                  | 54 (47.7)                |                      |
| >45                                      | 28 (14.8)                  | 18 (16.0)                |                      |
| <b>Gender</b>                            |                            |                          | 0.057                |
| Male                                     | 89 (47.1)                  | 67 (59.3)                |                      |
| Female                                   | 100 (52.9)                 | 46 (40.7)                |                      |
| <b>Transmission category</b>             |                            |                          | 0.084                |
| IDU                                      | 61 (32.3)                  | 35 (31.0)                |                      |
| HET                                      | 66 (34.9)                  | 51 (45.1)                |                      |
| UNK                                      | 62 (32.8)                  | 27 (23.9)                |                      |
| <b>Region in Uzbekistan <sup>3</sup></b> |                            |                          | <0.001               |
| Andijan*                                 | 45 (23.8)                  | 9 (8.0)                  |                      |
| Bukhara                                  | 1 (0.5)                    | 5 (4.4)                  |                      |
| Fergana*                                 | 16 (8.5)                   | 7 (6.2)                  |                      |
| Jizzakh                                  | 1 (0.5)                    | 4 (3.5)                  |                      |
| Karakalpakstan                           | 8 (4.2)                    | 0                        |                      |
| Xorazm                                   | 1 (0.5)                    | 7 (6.2)                  |                      |
| Namangan*                                | 6 (3.2)                    | 0                        |                      |
| Navoiy                                   | 1 (0.5)                    | 3 (2.7)                  |                      |
| Qashqadaryo                              | 6 (3.2)                    | 15 (13.3)                |                      |
| Samarkand                                | 16 (8.5)                   | 23 (20.3)                |                      |
| Sirdaryo                                 | 14 (7.4)                   | 5 (4.4)                  |                      |
| Surxondaryo                              | 7 (3.7)                    | 3 (2.7)                  |                      |
| Tashkent*                                | 67 (35.5)                  | 32 (28.3)                |                      |
| <b>Total</b>                             | 189 (100.0)                | 113 (100.0)              |                      |

<sup>1</sup> Characteristic indicated only for participants in the Nationwide Surveillance of HIV drug resistance (NS-HIVDR; see Materials and Methods); at the end of sampling in 2016, 36,000 people living with HIV were registered in Uzbekistan, including 12,000 women (15+) and 20,000 men (15+). <sup>2</sup> Value for the difference between HIV-1 subtypes (Pearson's chi-squared and/or Fisher's exact test). <sup>3</sup> Regions marked with an asterisk were considered as a single group under the name of North Eastern Region (NER) for some types of analysis (see main text). Abbreviations: HET, heterosexual contacts; IDU, injection drug users; UNK, unknown.
