# Supplementary material for: Identifying HIV-1 Transmission Clusters in Uzbekistan through Analysis of Molecular Surveillance Data
Source: Viruses. 2022 Jul 29;14(8):1675. doi: 10.3390/v14081675 (PMC9413238; doi:10.3390/v14081675)
Supplement: Supplementary file 1 [file viruses-14-01675-s001.zip › Supplementary Files/Table S2.xlsx]

## Sheet: NS-HIVDR dataset
	Table S2. GenBank Accession numbers, origin information and sampling date for the HIV-1 sequences used in this study.
	#	GenBank Acc. No.	Country	Location (region)	Date	Gender	Transmission route
	HIV-1 CRF02_AG recombinant dataset (from NS-HIVDR)
	1	MF401457	Uzbekistan	Andijan	2015	Female	injection drug users
	2	MF401458	Uzbekistan	Andijan	2015	Female	unknown
	3	MF401459	Uzbekistan	Andijan	2015	Female	injection drug users
	4	MF401460	Uzbekistan	Andijan	2015	Female	injection drug users
	5	MF401461	Uzbekistan	Andijan	2015	Female	heterosexual contacts
	6	MF401463	Uzbekistan	Andijan	2015	Male	injection drug users
	7	MF401466	Uzbekistan	Andijan	2015	Female	injection drug users
	8	MF401467	Uzbekistan	Andijan	2015	Male	unknown
	9	MF401468	Uzbekistan	Andijan	2015	Female	unknown
	10	MF401469	Uzbekistan	Andijan	2015	Male	unknown
	11	MF401470	Uzbekistan	Andijan	2015	Female	unknown
	12	MF401471	Uzbekistan	Andijan	2015	Female	injection drug users
	13	MF401472	Uzbekistan	Andijan	2015	Male	injection drug users
	14	MF401473	Uzbekistan	Andijan	2015	Female	unknown
	15	MF401475	Uzbekistan	Andijan	2015	Male	heterosexual contacts
	16	MF401476	Uzbekistan	Andijan	2015	Female	injection drug users
	17	MF401478	Uzbekistan	Andijan	2015	Male	unknown
	18	MF401479	Uzbekistan	Andijan	2015	Female	injection drug users
	19	MF401482	Uzbekistan	Andijan	2015	Female	unknown
	20	MF401484	Uzbekistan	Andijan	2015	Female	unknown
	21	MF401485	Uzbekistan	Andijan	2015	Male	heterosexual contacts
	22	MF401486	Uzbekistan	Andijan	2015	Female	unknown
	23	MF401487	Uzbekistan	Andijan	2015	Female	injection drug users
	24	MF401490	Uzbekistan	Andijan	2015	Female	unknown
	25	MF401491	Uzbekistan	Andijan	2015	Male	unknown
	26	MF401492	Uzbekistan	Andijan	2015	Male	heterosexual contacts
	27	MF401493	Uzbekistan	Andijan	2015	Female	unknown
	28	MF401495	Uzbekistan	Andijan	2015	Male	unknown
	29	MF401496	Uzbekistan	Andijan	2015	Female	unknown
	30	MF401497	Uzbekistan	Andijan	2015	Female	heterosexual contacts
	31	MF401498	Uzbekistan	Andijan	2015	Male	unknown
	32	MF401499	Uzbekistan	Andijan	2015	Male	heterosexual contacts
	33	MF401500	Uzbekistan	Andijan	2015	Male	heterosexual contacts
	34	MF401501	Uzbekistan	Andijan	2015	Female	unknown
	35	MF401502	Uzbekistan	Andijan	2015	Female	unknown
	36	MF401503	Uzbekistan	Andijan	2015	Female	injection drug users
	37	MF401504	Uzbekistan	Andijan	2015	Male	unknown
	38	MF401505	Uzbekistan	Andijan	2015	Male	injection drug users
	39	MF401506	Uzbekistan	Andijan	2015	Female	heterosexual contacts
	40	MF401507	Uzbekistan	Andijan	2015	Female	unknown
	41	MF401508	Uzbekistan	Andijan	2015	Male	unknown
	42	MF401509	Uzbekistan	Andijan	2015	Female	unknown
	43	MF401510	Uzbekistan	Andijan	2015	Female	unknown
	44	MF401512	Uzbekistan	Andijan	2015	Female	heterosexual contacts
	45	MF497187	Uzbekistan	Andijan	2015	Female	injection drug users
	46	MF431626	Uzbekistan	Bukhara	2015	Male	unknown
	47	MF431627	Uzbekistan	Fergana	2015	Female	injection drug users
	48	MF431628	Uzbekistan	Fergana	2015	Male	injection drug users
	49	MF431629	Uzbekistan	Fergana	2015	Male	heterosexual contacts
	50	MF431630	Uzbekistan	Fergana	2015	Female	heterosexual contacts
	51	MF431631	Uzbekistan	Fergana	2010	Female	injection drug users
	52	MF431632	Uzbekistan	Fergana	2015	Male	unknown
	53	MF431635	Uzbekistan	Fergana	2015	Male	heterosexual contacts
	54	MF431640	Uzbekistan	Fergana	2015	Female	heterosexual contacts
	55	MF431643	Uzbekistan	Fergana	2016	Male	heterosexual contacts
	56	MF431644	Uzbekistan	Fergana	2015	Female	heterosexual contacts
	57	MF431645	Uzbekistan	Fergana	2015	Male	injection drug users
	58	MF431646	Uzbekistan	Fergana	2015	Male	unknown
	59	MF431647	Uzbekistan	Fergana	2015	Male	injection drug users
	60	MF431648	Uzbekistan	Fergana	2015	Female	injection drug users
	61	MF431652	Uzbekistan	Fergana	2015	Female	heterosexual contacts
	62	MF431655	Uzbekistan	Fergana	2015	Female	unknown
	63	MF431656	Uzbekistan	Jizzakh	2015	Male	unknown
	64	MF431657	Uzbekistan	Karakalpakstan	2015	Male	injection drug users
	65	MF431658	Uzbekistan	Karakalpakstan	2015	Female	injection drug users
	66	MF431659	Uzbekistan	Karakalpakstan	2015	Male	injection drug users
	67	MF431660	Uzbekistan	Karakalpakstan	2015	Female	heterosexual contacts
	68	MF431661	Uzbekistan	Karakalpakstan	2015	Male	heterosexual contacts
	69	MF431662	Uzbekistan	Karakalpakstan	2015	Male	heterosexual contacts
	70	MF431663	Uzbekistan	Karakalpakstan	2015	Male	heterosexual contacts
	71	MF431664	Uzbekistan	Karakalpakstan	2015	Male	injection drug users
	72	MF431670	Uzbekistan	Qashqadaryo	2015	Female	heterosexual contacts
	73	MF431671	Uzbekistan	Qashqadaryo	2015	Male	heterosexual contacts
	74	MF431672	Uzbekistan	Qashqadaryo	2015	Male	heterosexual contacts
	75	MF431677	Uzbekistan	Qashqadaryo	2015	Male	heterosexual contacts
	76	MF431678	Uzbekistan	Qashqadaryo	2015	Female	injection drug users
	77	MF431685	Uzbekistan	Qashqadaryo	2015	Female	injection drug users
	78	MF431692	Uzbekistan	Xorazm	2015	Male	unknown
	79	MF431699	Uzbekistan	Namangan	2015	Female	injection drug users
	80	MF431700	Uzbekistan	Namangan	2015	Female	injection drug users
	81	MF431701	Uzbekistan	Namangan	2015	Male	injection drug users
	82	MF431702	Uzbekistan	Namangan	2015	Female	injection drug users
	83	MF431703	Uzbekistan	Namangan	2015	Male	unknown
	84	MF431705	Uzbekistan	Namangan	2015	Female	injection drug users
	85	MF431706	Uzbekistan	Navoiy	2015	Male	injection drug users
	86	MF431711	Uzbekistan	Tashkent	2015	Female	heterosexual contacts
	87	MF431712	Uzbekistan	Tashkent	2015	Female	injection drug users
	88	MF431714	Uzbekistan	Tashkent	2016	Male	unknown
	89	MF431716	Uzbekistan	Tashkent	2016	Female	unknown
	90	MF431718	Uzbekistan	Tashkent	2016	Male	unknown
	91	MF431720	Uzbekistan	Tashkent	2016	Female	unknown
	92	MF497082	Uzbekistan	Tashkent	2015	Female	injection drug users
	93	MF497083	Uzbekistan	Tashkent	2015	Male	unknown
	94	MF497084	Uzbekistan	Tashkent	2015	Male	injection drug users
	95	MF497085	Uzbekistan	Tashkent	2015	Male	unknown
	96	MF497086	Uzbekistan	Tashkent	2015	Male	injection drug users
	97	MF497087	Uzbekistan	Tashkent	2015	Male	heterosexual contacts
	98	MF497089	Uzbekistan	Tashkent	2015	Female	injection drug users
	99	MF497091	Uzbekistan	Tashkent	2015	Male	unknown
	100	MF497093	Uzbekistan	Tashkent	2015	Female	unknown
	101	MF497094	Uzbekistan	Tashkent	2015	Female	injection drug users
	102	MF497096	Uzbekistan	Tashkent	2015	Male	injection drug users
	103	MF497097	Uzbekistan	Tashkent	2015	Female	unknown
	104	MF497099	Uzbekistan	Tashkent	2015	Female	injection drug users
	105	MF497101	Uzbekistan	Tashkent	2015	Female	heterosexual contacts
	106	MF497103	Uzbekistan	Tashkent	2016	Male	unknown
	107	MF497104	Uzbekistan	Tashkent	2016	Male	unknown
	108	MF497105	Uzbekistan	Tashkent	2016	Female	unknown
	109	MF497106	Uzbekistan	Tashkent	2016	Male	unknown
	110	MF497107	Uzbekistan	Tashkent	2016	Male	unknown
	111	MF497111	Uzbekistan	Samarkand	2015	Male	heterosexual contacts
	112	MF497116	Uzbekistan	Samarkand	2015	Female	injection drug users
	113	MF497119	Uzbekistan	Samarkand	2015	Female	unknown
	114	MF497122	Uzbekistan	Samarkand	2015	Male	injection drug users
	115	MF497126	Uzbekistan	Samarkand	2015	Female	injection drug users
	116	MF497127	Uzbekistan	Samarkand	2015	Male	heterosexual contacts
	117	MF497131	Uzbekistan	Samarkand	2015	Female	unknown
	118	MF497134	Uzbekistan	Samarkand	2015	Female	unknown
	119	MF497137	Uzbekistan	Samarkand	2015	Female	unknown
	120	MF497141	Uzbekistan	Samarkand	2015	Male	injection drug users
	121	MF497142	Uzbekistan	Samarkand	2015	Female	heterosexual contacts
	122	MF497143	Uzbekistan	Samarkand	2015	Female	heterosexual contacts
	123	MF497144	Uzbekistan	Samarkand	2015	Male	heterosexual contacts
	124	MF497146	Uzbekistan	Samarkand	2015	Female	heterosexual contacts
	125	MF497148	Uzbekistan	Samarkand	2015	Female	unknown
	126	MF497149	Uzbekistan	Samarkand	2016	Male	unknown
	127	MF497150	Uzbekistan	Sirdaryo	2015	Female	heterosexual contacts
	128	MF497151	Uzbekistan	Sirdaryo	2015	Male	injection drug users
	129	MF497152	Uzbekistan	Sirdaryo	2015	Female	heterosexual contacts
	130	MF497154	Uzbekistan	Sirdaryo	2015	Male	injection drug users
	131	MF497156	Uzbekistan	Sirdaryo	2015	Male	injection drug users
	132	MF497158	Uzbekistan	Sirdaryo	2015	Female	unknown
	133	MF497159	Uzbekistan	Sirdaryo	2015	Male	injection drug users
	134	MF497160	Uzbekistan	Sirdaryo	2015	Female	injection drug users
	135	MF497161	Uzbekistan	Sirdaryo	2015	Female	heterosexual contacts
	136	MF497162	Uzbekistan	Sirdaryo	2015	Female	heterosexual contacts
	137	MF497164	Uzbekistan	Sirdaryo	2015	Female	heterosexual contacts
	138	MF497165	Uzbekistan	Sirdaryo	2015	Male	heterosexual contacts
	139	MF497167	Uzbekistan	Sirdaryo	2015	Male	heterosexual contacts
	140	MF497168	Uzbekistan	Sirdaryo	2015	Female	heterosexual contacts
	141	MF497169	Uzbekistan	Surxondaryo	2015	Female	heterosexual contacts
	142	MF497170	Uzbekistan	Surxondaryo	2015	Female	injection drug users
	143	MF497171	Uzbekistan	Surxondaryo	2015	Female	heterosexual contacts
	144	MF497177	Uzbekistan	Surxondaryo	2015	Male	heterosexual contacts
	145	MF497178	Uzbekistan	Surxondaryo	2015	Female	injection drug users
	146	MF497180	Uzbekistan	Surxondaryo	2015	Male	injection drug users
	147	MF497184	Uzbekistan	Surxondaryo	2015	Male	unknown
	148	MF497186	Uzbekistan	Tashkent	2015	Male	unknown
	149	MF497189	Uzbekistan	Tashkent	2015	Female	heterosexual contacts
	150	MF497191	Uzbekistan	Tashkent	2015	Female	heterosexual contacts
	151	MF497193	Uzbekistan	Tashkent	2015	Female	injection drug users
	152	MF497194	Uzbekistan	Tashkent	2015	Female	heterosexual contacts
	153	MF497195	Uzbekistan	Tashkent	2015	Male	unknown
	154	MF497196	Uzbekistan	Tashkent	2015	Male	heterosexual contacts
	155	MF497197	Uzbekistan	Tashkent	2015	Male	heterosexual contacts
	156	MF497198	Uzbekistan	Tashkent	2015	Male	heterosexual contacts
	157	MF497200	Uzbekistan	Tashkent	2015	Female	heterosexual contacts
	158	MF497201	Uzbekistan	Tashkent	2015	Male	heterosexual contacts
	159	MF497202	Uzbekistan	Tashkent	2015	Female	unknown
	160	MF497203	Uzbekistan	Tashkent	2015	Male	unknown
	161	MF497204	Uzbekistan	Tashkent	2015	Female	heterosexual contacts
	162	MF497205	Uzbekistan	Tashkent	2015	Female	heterosexual contacts
	163	MF497208	Uzbekistan	Tashkent	2015	Female	heterosexual contacts
	164	MF497209	Uzbekistan	Tashkent	2015	Male	heterosexual contacts
	165	MF497210	Uzbekistan	Tashkent	2015	Female	heterosexual contacts
	166	MF497211	Uzbekistan	Tashkent	2015	Male	unknown
	167	MF497212	Uzbekistan	Tashkent	2015	Female	heterosexual contacts
	168	MF497220	Uzbekistan	Tashkent	2015	Male	injection drug users
	169	MF497223	Uzbekistan	Tashkent	2015	Male	unknown
	170	MF497224	Uzbekistan	Tashkent	2015	Male	unknown
	171	MF497225	Uzbekistan	Tashkent	2015	Female	unknown
	172	MF497226	Uzbekistan	Tashkent	2015	Female	unknown
	173	MF497228	Uzbekistan	Tashkent	2015	Male	unknown
	174	MF497231	Uzbekistan	Tashkent	2015	Female	injection drug users
	175	MF497235	Uzbekistan	Tashkent	2015	Male	injection drug users
	176	MF497236	Uzbekistan	Tashkent	2015	Female	injection drug users
	177	MF497238	Uzbekistan	Tashkent	2015	Male	heterosexual contacts
	178	MF497241	Uzbekistan	Tashkent	2015	Male	heterosexual contacts
	179	MF497243	Uzbekistan	Tashkent	2015	Female	unknown
	180	MF497245	Uzbekistan	Tashkent	2015	Female	heterosexual contacts
	181	MF497247	Uzbekistan	Tashkent	2015	Male	heterosexual contacts
	182	MF497248	Uzbekistan	Tashkent	2015	Male	injection drug users
	183	MF497253	Uzbekistan	Tashkent	2015	Female	unknown
	184	MF497254	Uzbekistan	Tashkent	2015	Male	injection drug users
	185	MF497255	Uzbekistan	Tashkent	2015	Male	injection drug users
	186	MF497257	Uzbekistan	Tashkent	2015	Female	unknown
	187	MF497258	Uzbekistan	Tashkent	2015	Male	heterosexual contacts
	188	MF497259	Uzbekistan	Tashkent	2015	Female	injection drug users
	189	MF497263	Uzbekistan	Tashkent	2015	Male	injection drug users
	HIV-1 sub-subtype A6 dataset (from NS-HIVDR)
	1	MF401462	Uzbekistan	Andijan	2015	Male	heterosexual contacts
	2	MF401464	Uzbekistan	Andijan	2015	Male	unknown
	3	MF401465	Uzbekistan	Andijan	2015	Female	injection drug users
	4	MF401477	Uzbekistan	Andijan	2015	Male	injection drug users
	5	MF401481	Uzbekistan	Andijan	2015	Male	unknown
	6	MF401483	Uzbekistan	Andijan	2015	Male	unknown
	7	MF401488	Uzbekistan	Andijan	2015	Male	injection drug users
	8	MF401494	Uzbekistan	Andijan	2015	Female	heterosexual contacts
	9	MF401511	Uzbekistan	Andijan	2015	Female	unknown
	10	MF497233	Uzbekistan	Bukhara	2015	Male	injection drug users
	11	MF431622	Uzbekistan	Bukhara	2015	Male	injection drug users
	12	MF431623	Uzbekistan	Bukhara	2015	Male	injection drug users
	13	MF431624	Uzbekistan	Bukhara	2015	Male	unknown
	14	MF431625	Uzbekistan	Bukhara	2015	Male	unknown
	15	MF431633	Uzbekistan	Fergana	2015	Male	unknown
	16	MF431634	Uzbekistan	Fergana	2015	Female	unknown
	17	MF431636	Uzbekistan	Fergana	2015	Male	heterosexual contacts
	18	MF431637	Uzbekistan	Fergana	2015	Male	injection drug users
	19	MF431638	Uzbekistan	Fergana	2015	Male	injection drug users
	20	MF431639	Uzbekistan	Fergana	2015	Female	injection drug users
	21	MF431649	Uzbekistan	Fergana	2015	Male	heterosexual contacts
	22	MF431650	Uzbekistan	Jizzakh	2015	Female	heterosexual contacts
	23	MF431651	Uzbekistan	Jizzakh	2015	Male	unknown
	24	MF431653	Uzbekistan	Jizzakh	2015	Female	heterosexual contacts
	25	MF431654	Uzbekistan	Jizzakh	2015	Male	unknown
	26	MF431665	Uzbekistan	Qashqadaryo	2015	Male	injection drug users
	27	MF431666	Uzbekistan	Qashqadaryo	2015	Female	injection drug users
	28	MF431667	Uzbekistan	Qashqadaryo	2015	Female	heterosexual contacts
	29	MF431669	Uzbekistan	Qashqadaryo	2015	Male	unknown
	30	MF431673	Uzbekistan	Qashqadaryo	2015	Male	unknown
	31	MF431674	Uzbekistan	Qashqadaryo	2015	Female	heterosexual contacts
	32	MF431675	Uzbekistan	Qashqadaryo	2015	Male	heterosexual contacts
	33	MF431676	Uzbekistan	Qashqadaryo	2015	Male	injection drug users
	34	MF431679	Uzbekistan	Qashqadaryo	2015	Female	injection drug users
	35	MF431680	Uzbekistan	Qashqadaryo	2015	Female	heterosexual contacts
	36	MF431681	Uzbekistan	Qashqadaryo	2015	Male	injection drug users
	37	MF431682	Uzbekistan	Qashqadaryo	2015	Male	injection drug users
	38	MF431683	Uzbekistan	Qashqadaryo	2015	Male	heterosexual contacts
	39	MF431684	Uzbekistan	Qashqadaryo	2015	Female	heterosexual contacts
	40	MF431686	Uzbekistan	Qashqadaryo	2015	Female	heterosexual contacts
	41	MF431688	Uzbekistan	Xorazm	2015	Male	injection drug users
	42	MF431689	Uzbekistan	Xorazm	2015	Male	heterosexual contacts
	43	MF431690	Uzbekistan	Xorazm	2015	Female	unknown
	44	MF431691	Uzbekistan	Xorazm	2015	Male	heterosexual contacts
	45	MF431693	Uzbekistan	Xorazm	2015	Male	heterosexual contacts
	46	MF431694	Uzbekistan	Xorazm	2015	Male	heterosexual contacts
	47	MF431695	Uzbekistan	Xorazm	2015	Male	injection drug users
	48	MF431707	Uzbekistan	Navoiy	2015	Male	heterosexual contacts
	49	MF431708	Uzbekistan	Navoiy	2015	Male	heterosexual contacts
	50	MF431709	Uzbekistan	Navoiy	2015	Female	heterosexual contacts
	51	MF431719	Uzbekistan	Tashkent	2010	Female	MTC
	52	MF497081	Uzbekistan	Tashkent	2015	Female	heterosexual contacts
	53	MF497088	Uzbekistan	Tashkent	2015	Female	heterosexual contacts
	54	MF497092	Uzbekistan	Tashkent	2015	Female	injection drug users
	55	MF497098	Uzbekistan	Tashkent	2015	Female	injection drug users
	56	MF497100	Uzbekistan	Tashkent	2015	Female	heterosexual contacts
	57	MF497108	Uzbekistan	Tashkent	2016	Female	injection drug users
	58	MF497109	Uzbekistan	Samarkand	2015	Male	heterosexual contacts
	59	MF497110	Uzbekistan	Samarkand	2015	Male	unknown
	60	MF497114	Uzbekistan	Samarkand	2015	Female	heterosexual contacts
	61	MF497115	Uzbekistan	Samarkand	2015	Female	heterosexual contacts
	62	MF497117	Uzbekistan	Samarkand	2015	Male	unknown
	63	MF497118	Uzbekistan	Samarkand	2015	Female	unknown
	64	MF497120	Uzbekistan	Samarkand	2015	Female	heterosexual contacts
	65	MF497121	Uzbekistan	Samarkand	2015	Female	heterosexual contacts
	66	MF497123	Uzbekistan	Samarkand	2015	Female	unknown
	67	MF497124	Uzbekistan	Samarkand	2015	Female	heterosexual contacts
	68	MF497125	Uzbekistan	Samarkand	2015	Female	unknown
	69	MF497128	Uzbekistan	Samarkand	2015	Male	unknown
	70	MF497129	Uzbekistan	Samarkand	2015	Male	injection drug users
	71	MF497130	Uzbekistan	Samarkand	2015	Male	heterosexual contacts
	72	MF497132	Uzbekistan	Samarkand	2015	Male	unknown
	73	MF497133	Uzbekistan	Samarkand	2015	Male	heterosexual contacts
	74	MF497135	Uzbekistan	Samarkand	2015	Male	injection drug users
	75	MF497136	Uzbekistan	Samarkand	2015	Male	injection drug users
	76	MF497138	Uzbekistan	Samarkand	2015	Male	heterosexual contacts
	77	MF497139	Uzbekistan	Samarkand	2015	Female	heterosexual contacts
	78	MF497140	Uzbekistan	Samarkand	2015	Female	heterosexual contacts
	79	MF497145	Uzbekistan	Samarkand	2015	Male	unknown
	80	MF497147	Uzbekistan	Samarkand	2015	Male	injection drug users
	81	MF497153	Uzbekistan	Sirdaryo	2015	Male	heterosexual contacts
	82	MF497155	Uzbekistan	Sirdaryo	2015	Male	heterosexual contacts
	83	MF497157	Uzbekistan	Sirdaryo	2015	Male	unknown
	84	MF497163	Uzbekistan	Sirdaryo	2015	Female	heterosexual contacts
	85	MF497166	Uzbekistan	Sirdaryo	2015	Female	heterosexual contacts
	86	MF497175	Uzbekistan	Surxondaryo	2015	Male	injection drug users
	87	MF497176	Uzbekistan	Surxondaryo	2015	Male	heterosexual contacts
	88	MF497179	Uzbekistan	Surxondaryo	2015	Female	injection drug users
	89	MF497188	Uzbekistan	Tashkent	2015	Male	heterosexual contacts
	90	MF497190	Uzbekistan	Tashkent	2015	Female	heterosexual contacts
	91	MF497192	Uzbekistan	Tashkent	2015	Female	heterosexual contacts
	92	MF497199	Uzbekistan	Tashkent	2015	Female	heterosexual contacts
	93	MF497206	Uzbekistan	Tashkent	2015	Male	injection drug users
	94	MF497207	Uzbekistan	Tashkent	2015	Female	heterosexual contacts
	95	MF497213	Uzbekistan	Tashkent	2015	Male	injection drug users
	96	MF497214	Uzbekistan	Tashkent	2015	Male	injection drug users
	97	MF497216	Uzbekistan	Tashkent	2015	Male	heterosexual contacts
	98	MF497217	Uzbekistan	Tashkent	2015	Female	heterosexual contacts
	99	MF497218	Uzbekistan	Tashkent	2015	Female	heterosexual contacts
	100	MF497219	Uzbekistan	Tashkent	2015	Male	injection drug users
	101	MF497222	Uzbekistan	Tashkent	2015	Male	injection drug users
	102	MF497227	Uzbekistan	Tashkent	2015	Female	unknown
	103	MF497229	Uzbekistan	Tashkent	2015	Male	unknown
	104	MF497230	Uzbekistan	Tashkent	2015	Male	unknown
	105	MF497234	Uzbekistan	Tashkent	2015	Male	injection drug users
	106	MF497242	Uzbekistan	Tashkent	2015	Male	injection drug users
	107	MF497244	Uzbekistan	Tashkent	2015	Male	heterosexual contacts
	108	MF497246	Uzbekistan	Tashkent	2015	Female	heterosexual contacts
	109	MF497249	Uzbekistan	Tashkent	2015	Female	heterosexual contacts
	110	MF497251	Uzbekistan	Tashkent	2015	Male	injection drug users
	111	MF497252	Uzbekistan	Tashkent	2015	Male	injection drug users
	112	MF497256	Uzbekistan	Tashkent	2015	Male	unknown
	113	MF497260	Uzbekistan	Tashkent	2015	Female	heterosexual contacts
	114	AY829203	Uzbekistan	Tashkent	2002	Male	injection drug users
	115	AY829205	Uzbekistan	Tashkent	2002	Male	injection drug users
	116	AY829206	Uzbekistan	Tashkent	2002	Male	injection drug users
	117	AY829208	Uzbekistan	Tashkent	2002	Male	injection drug users
	118	AY829209	Uzbekistan	Tashkent	2002	Male	injection drug users
	119	AY829211	Uzbekistan	Tashkent	2002	Male	injection drug users
	120	AY829212	Uzbekistan	Tashkent	2002	Female	injection drug users
	121	KY235841	Uzbekistan	Tashkent	2013	Male	unknown
	122	KY235842	Uzbekistan	Tashkent	2013	Female	unknown
	123	KY235843	Uzbekistan	Tashkent	2013	Female	unknown
	124	KY235845	Uzbekistan	Tashkent	2013	Male	unknown
	125	KY235847	Uzbekistan	Tashkent	2013	Female	unknown
	126	KY235848	Uzbekistan	Tashkent	2013	Male	unknown
	127	KY235852	Uzbekistan	Tashkent	2013	Male	unknown

## Sheet: HIV-1 LANL dataset
#	GenBank Acc. No.	Country	Date
HIV-1 sub-subtype A6 dataset (from HIV-1 LANL database [https://www.hiv.lanl.gov/content/index])
1	KF720944	Armenia	2009
2	KF720951	Armenia	2009
3	KF720957	Armenia	2009
4	EU345608	Belarus	1997
5	EU345609	Belarus	1997
6	EU345610	Belarus	1997
7	EU345611	Belarus	1997
8	EU345612	Belarus	1997
9	EU345613	Belarus	1997
10	MH494212	Belarus	2005
11	HF679246	Belarus	2008
12	HE657459	Belarus	2010
13	HE657468	Belarus	2010
14	HE657482	Belarus	2010
15	HE657502	Belarus	2010
16	HE657519	Belarus	2010
17	HE657486	Belarus	2011
18	HE657487	Belarus	2011
19	MH494269	Belarus	2011
20	HF679217	Belarus	2012
21	MH494281	Belarus	2012
22	MH494285	Belarus	2012
23	MH494291	Belarus	2012
24	MH494209	Belarus	2013
25	KM190955	Belarus	2013
26	MH494288	Belarus	2013
27	MH494262	Belarus	2013
28	MH494283	Belarus	2013
29	MH494294	Belarus	2013
30	MH494219	Belarus	2015
31	MH494221	Belarus	2015
32	MH494240	Belarus	2015
33	MH494250	Belarus	2015
34	MH494252	Belarus	2015
35	MH494272	Belarus	2015
36	MH494275	Belarus	2015
37	MH494277	Belarus	2015
38	MH494206	Belarus	2016
39	MH494213	Belarus	2016
40	MH494273	Belarus	2016
41	MH494248	Belarus	2016
42	MH494258	Belarus	2016
43	EU673388	Cyprus	2005
44	EU673389	Cyprus	2005
45	EU673402	Cyprus	2006
46	EU673405	Cyprus	2006
47	MF403212	Spain	2006
48	GQ241002	Spain	2007
49	KC340436	Spain	2008
50	KC340486	Spain	2009
51	MF403215	Spain	2012
52	MG798936	Kyrgyzstan	2017
53	MG798938	Kyrgyzstan	2017
54	MG798940	Kyrgyzstan	2017
55	MG798942	Kyrgyzstan	2017
56	MG798944	Kyrgyzstan	2017
57	MG798946	Kyrgyzstan	2017
58	MG798951	Kyrgyzstan	2017
59	MG798953	Kyrgyzstan	2017
60	MG798955	Kyrgyzstan	2017
61	MG798960	Kyrgyzstan	2017
62	MG798962	Kyrgyzstan	2017
63	MG798966	Kyrgyzstan	2017
64	MG798967	Kyrgyzstan	2017
65	MG798968	Kyrgyzstan	2017
66	MG798971	Kyrgyzstan	2017
67	MG798949	Kyrgyzstan	2017
68	MG798950	Kyrgyzstan	2017
69	MG798954	Kyrgyzstan	2017
70	MG798969	Kyrgyzstan	2017
71	MG799042	Kyrgyzstan	2017
72	MG799048	Kyrgyzstan	2017
73	EU345695	Kazakhstan	1998
74	EU345696	Kazakhstan	1998
75	EU345697	Kazakhstan	1998
76	EU345698	Kazakhstan	1998
77	EU345699	Kazakhstan	1998
78	EF589042	Kazakhstan	2002
79	KF512380	Kazakhstan	2012
80	KF512389	Kazakhstan	2012
81	KF512390	Kazakhstan	2012
82	KF498483	Kazakhstan	2012
83	KF512381	Kazakhstan	2012
84	KF512384	Kazakhstan	2012
85	KF512387	Kazakhstan	2012
86	KF498462	Kazakhstan	2012
87	KF498478	Kazakhstan	2012
88	KF498480	Kazakhstan	2012
89	KF498464	Kazakhstan	2012
90	KF498485	Kazakhstan	2012
91	KF498458	Kazakhstan	2013
92	KF498455	Kazakhstan	2013
93	KF498453	Kazakhstan	2013
94	KM284597	Poland	2009
95	KM284021	Poland	2012
96	KM284113	Poland	2013
97	EU345788	Russia	1999
98	EU345725	Russia	2001
99	EU345731	Russia	2001
100	EU345739	Russia	2001
101	EU345743	Russia	2001
102	EU345748	Russia	2001
103	EU345749	Russia	2001
104	EU345754	Russia	2001
105	EU345758	Russia	2001
106	EU345773	Russia	2001
107	EU345895	Russia	2002
108	EU345900	Russia	2002
109	EU345902	Russia	2002
110	EU345905	Russia	2002
111	FJ009715	Russia	2006
112	FJ009727	Russia	2006
113	FJ009729	Russia	2006
114	FJ009730	Russia	2006
115	FJ009735	Russia	2006
116	FJ009738	Russia	2006
117	FJ009742	Russia	2006
118	FJ009743	Russia	2006
119	FJ009744	Russia	2006
120	FJ009747	Russia	2006
121	FJ009749	Russia	2006
122	FJ009750	Russia	2006
123	FJ009751	Russia	2006
124	FJ009753	Russia	2006
125	FJ009754	Russia	2006
126	FJ009759	Russia	2006
127	FJ009762	Russia	2006
128	FJ009763	Russia	2006
129	FJ009764	Russia	2006
130	FJ009765	Russia	2006
131	FJ009768	Russia	2006
132	FJ009770	Russia	2006
133	FJ009774	Russia	2006
134	FJ009775	Russia	2006
135	FJ009776	Russia	2006
136	FJ009779	Russia	2006
137	FJ009790	Russia	2006
138	FJ009791	Russia	2006
139	FJ009797	Russia	2006
140	FJ009800	Russia	2006
141	FJ009801	Russia	2006
142	FJ009802	Russia	2006
143	FJ009811	Russia	2006
144	GQ867608	Russia	2006
145	GQ867614	Russia	2006
146	GQ867624	Russia	2006
147	GQ867628	Russia	2006
148	GQ867629	Russia	2006
149	GQ867635	Russia	2007
150	HM345548	Russia	2007
151	HM345558	Russia	2007
152	MK931566	Russia	2007
153	MK931812	Russia	2007
154	MK931814	Russia	2007
155	MK931816	Russia	2007
156	MK931824	Russia	2007
157	MK931827	Russia	2007
158	MK931832	Russia	2007
159	MK931834	Russia	2007
160	MK931844	Russia	2007
161	HM345568	Russia	2008
162	HQ161911	Russia	2008
163	HQ161915	Russia	2008
164	HQ161916	Russia	2008
165	HQ161920	Russia	2008
166	HQ161922	Russia	2008
167	HQ395275	Russia	2008
168	HQ412523	Russia	2008
169	HQ412525	Russia	2008
170	HQ424155	Russia	2008
171	HQ449402	Russia	2008
172	JQ292893	Russia	2008
173	KR233332	Russia	2008
174	KR233342	Russia	2008
175	KR233367	Russia	2008
176	KR233374	Russia	2008
177	KR233376	Russia	2008
178	KR233386	Russia	2008
179	KR233387	Russia	2008
180	KR233395	Russia	2008
181	KR233404	Russia	2008
182	MK931860	Russia	2008
183	MK931867	Russia	2008
184	MK931868	Russia	2008
185	MK931879	Russia	2008
186	HQ129990	Russia	2009
187	MK931873	Russia	2009
188	HQ130000	Russia	2010
189	JX290208	Russia	2010
190	JX290228	Russia	2010
191	JX290235	Russia	2010
192	JX141210	Russia	2011
193	KF374855	Russia	2011
194	KF374859	Russia	2011
195	KF374866	Russia	2011
196	KF374870	Russia	2011
197	KF374876	Russia	2011
198	KP659707	Russia	2011
199	KP659719	Russia	2011
200	MH666576	Russia	2011
201	MK589458	Russia	2011
202	MK931551	Russia	2011
203	KC208003	Russia	2012
204	KC254581	Russia	2012
205	KC254597	Russia	2012
206	KC254605	Russia	2012
207	KC254621	Russia	2012
208	KC254637	Russia	2012
209	KC509837	Russia	2012
210	KC665922	Russia	2012
211	KC665931	Russia	2012
212	KF374887	Russia	2012
213	KF374925	Russia	2012
214	KF971945	Russia	2012
215	KJ499578	Russia	2012
216	KJ499587	Russia	2012
217	KJ499611	Russia	2012
218	KJ499614	Russia	2012
219	KJ722077	Russia	2012
220	KJ722090	Russia	2012
221	KJ722094	Russia	2012
222	KJ722108	Russia	2012
223	KJ722135	Russia	2012
224	KJ722138	Russia	2012
225	MH666371	Russia	2012
226	MH666414	Russia	2012
227	KX432090	Russia	2013
228	KX432092	Russia	2013
229	KX432119	Russia	2013
230	MF124850	Russia	2013
231	MF124871	Russia	2013
232	MG902950	Russia	2013
233	MH330345	Russia	2013
234	MH666537	Russia	2013
235	MH666542	Russia	2013
236	MH666611	Russia	2013
237	MH666620	Russia	2013
238	MH666638	Russia	2013
239	KP090074	Russia	2014
240	KP090080	Russia	2014
241	KX432132	Russia	2014
242	MH666644	Russia	2014
243	KX640139	Russia	2015
244	MF668588	Russia	2015
245	MG986152	Russia	2015
246	MG986156	Russia	2015
247	MG986201	Russia	2015
248	MH667022	Russia	2015
249	MH667091	Russia	2015
250	MK589658	Russia	2015
251	MK931640	Russia	2015
252	MK931642	Russia	2015
253	MK931689	Russia	2015
254	KY052011	Russia	2016
255	MG063795	Russia	2016
256	MG986213	Russia	2016
257	MH667229	Russia	2016
258	MK606550	Russia	2016
259	MK795086	Russia	2016
260	MK795120	Russia	2016
261	MK931938	Russia	2016
262	MN116251	Russia	2016
263	MN116255	Russia	2016
264	MN116283	Russia	2016
265	MK512435	Russia	2017
266	MK512440	Russia	2017
267	MK606585	Russia	2017
268	MN116316	Russia	2017
269	MN116339	Russia	2017
270	MN116387	Russia	2017
271	MN116412	Russia	2017
272	MN116413	Russia	2017
273	MN235907	Russia	2017
274	MN235937	Russia	2017
275	MN235939	Russia	2017
276	MN235941	Russia	2017
277	MW115498	Russia	2017
278	MW115499	Russia	2017
279	MW115503	Russia	2017
280	MW115506	Russia	2017
281	MW115513	Russia	2017
282	MK002565	Russia	2018
283	MK931543	Russia	2018
284	MN116450	Russia	2018
285	MH543049	Tajikistan	2017
286	MH543053	Tajikistan	2017
287	MH543060	Tajikistan	2017
288	MH543063	Tajikistan	2017
289	MH543071	Tajikistan	2017
290	MH543073	Tajikistan	2017
291	MH543078	Tajikistan	2017
292	MH543083	Tajikistan	2017
293	MH543086	Tajikistan	2017
294	MH543090	Tajikistan	2017
295	MH543094	Tajikistan	2017
296	MH543097	Tajikistan	2017
297	MH543103	Tajikistan	2017
298	MH543105	Tajikistan	2017
299	MH543107	Tajikistan	2017
300	MH543109	Tajikistan	2017
301	MH543031	Tajikistan	2017
302	MH543033	Tajikistan	2017
303	MH543045	Tajikistan	2017
304	MH543015	Tajikistan	2017
305	MH543020	Tajikistan	2017
306	MH543108	Tajikistan	2017
307	MH543111	Tajikistan	2017
308	MK245479	Tajikistan	2017
309	MK245504	Tajikistan	2017
310	MK245523	Tajikistan	2017
311	MK245663	Tajikistan	2017
312	MK245669	Tajikistan	2017
313	MK245693	Tajikistan	2017
314	MK245698	Tajikistan	2017
315	EU345839	Ukraine	1997
316	EU345831	Ukraine	1997
317	EU345832	Ukraine	1997
318	EU345833	Ukraine	1997
319	EU345834	Ukraine	1997
320	EU345835	Ukraine	1997
321	EU345836	Ukraine	1997
322	EU345837	Ukraine	1997
323	EU345838	Ukraine	1997
324	EU345839	Ukraine	1997
325	EU345840	Ukraine	1997
326	DQ823358	Ukraine	2001
327	DQ055180	Ukraine	2001
328	DQ055182	Ukraine	2001
329	DQ055184	Ukraine	2001
330	DQ823357	Ukraine	2001
331	DQ055188	Ukraine	2001
332	DQ055190	Ukraine	2001
333	DQ055191	Ukraine	2001
334	DQ055192	Ukraine	2001
335	DQ055221	Ukraine	2001
336	DQ055223	Ukraine	2001
337	DQ055224	Ukraine	2001
338	DQ055229	Ukraine	2001
339	DQ055230	Ukraine	2001
340	DQ055231	Ukraine	2001
341	DQ055232	Ukraine	2001
342	DQ055233	Ukraine	2001
343	DQ055234	Ukraine	2001
344	DQ055235	Ukraine	2001
345	DQ055238	Ukraine	2001
346	DQ055239	Ukraine	2001
347	DQ055240	Ukraine	2001
348	DQ055241	Ukraine	2001
349	DQ055242	Ukraine	2001
350	DQ823366	Ukraine	2001
351	DQ823367	Ukraine	2001
352	DQ055262	Ukraine	2001
353	DQ055175	Ukraine	2001
354	DQ055282	Ukraine	2002
355	DQ055276	Ukraine	2002
356	HQ161909	Ukraine	2009
357	KY370249	Ukraine	2014
358	KY370256	Ukraine	2014
359	KY370331	Ukraine	2014
360	KY370349	Ukraine	2014
361	KY370352	Ukraine	2014
362	KY370367	Ukraine	2014
363	KY370368	Ukraine	2014
364	KY370378	Ukraine	2014
365	KY370383	Ukraine	2014
366	KY370394	Ukraine	2014
367	KY370402	Ukraine	2014
368	KY370414	Ukraine	2014
369	KY370419	Ukraine	2014
370	KY370168	Ukraine	2014
371	KY370145	Ukraine	2014
372	KY370175	Ukraine	2014
373	KY370412	Ukraine	2014
374	MK228306	Ukraine	2015
375	MK228316	Ukraine	2015
376	MK228317	Ukraine	2015
377	MK228273	Ukraine	2015
378	MK228294	Ukraine	2015
379	KY370242	Ukraine	2015
380	KY370423	Ukraine	2015
381	MK228351	Ukraine	2016
382	MK228355	Ukraine	2016
383	MK228597	Ukraine	2016
384	MK228363	Ukraine	2016
385	MK228377	Ukraine	2016
386	MK228380	Ukraine	2016
387	MK228382	Ukraine	2016
388	MK228384	Ukraine	2016
389	MK228388	Ukraine	2016
390	MK228393	Ukraine	2016
391	MK228396	Ukraine	2016
392	MK228608	Ukraine	2016
393	MK228400	Ukraine	2016
HIV-1 CRF02_AG/CRF063 recombinant dataset (from HIV-1 LANL database [https://www.hiv.lanl.gov/content/index])
1	MG799098	Kyrgyzstan	2017
2	MK228730	Kyrgyzstan	2017
3	MH543215	Tajikistan	2017
4	MW303678	Kyrgyzstan	2019
5	AY829214	Uzbekistan	2002
6	MK228768	Kyrgyzstan	2017
7	MK228767	Kyrgyzstan	2017
8	MK228761	Kyrgyzstan	2017
9	MH543132	Tajikistan	2017
10	KY235803	Uzbekistan	2013
11	KY235810	Uzbekistan	2013
12	MK228752	Kyrgyzstan	2017
13	MK228772	Kyrgyzstan	2017
14	AY829204	Uzbekistan	2002
15	MW303731	Kyrgyzstan	2019
16	MK228734	Kyrgyzstan	2017
17	MT452405	Kyrgyzstan	2018
18	MW303654	Kyrgyzstan	2019
19	MG799095	Kyrgyzstan	2017
20	MG799080	Kyrgyzstan	2017
21	MW303732	Kyrgyzstan	2019
22	MG799079	Kyrgyzstan	2017
23	MW303722	Kyrgyzstan	2019
24	MH543129	Tajikistan	2017
25	KR233388	Russia	2008
26	MW303657	Kyrgyzstan	2019
27	MK245761	Tajikistan	2017
28	MH543195	Tajikistan	2017
29	MH543125	Tajikistan	2017
30	MW303666	Kyrgyzstan	2019
31	KY235835	Uzbekistan	2015
32	MH543190	Tajikistan	2017
33	MH543191	Tajikistan	2017
34	MH543161	Tajikistan	2017
35	MW303653	Kyrgyzstan	2019
36	MW303681	Kyrgyzstan	2019
37	MW303684	Kyrgyzstan	2019
38	MW303649	Kyrgyzstan	2019
39	MW303682	Kyrgyzstan	2019
40	MK228763	Kyrgyzstan	2017
41	MW303650	Kyrgyzstan	2019
42	MW303676	Kyrgyzstan	2019
43	MG799066	Kyrgyzstan	2017
44	MK228774	Kyrgyzstan	2017
45	MK228780	Kyrgyzstan	2017
46	MK228759	Kyrgyzstan	2017
47	MH543216	Tajikistan	2017
48	KY235802	Uzbekistan	2013
49	MH543134	Tajikistan	2017
50	MK245576	Tajikistan	2017
51	MH543143	Tajikistan	2017
52	KY235797	Uzbekistan	2013
53	MW303717	Kyrgyzstan	2019
54	JX500697	Russia	2011
55	KY235816	Uzbekistan	2015
56	MH543177	Tajikistan	2017
57	MH543194	Tajikistan	2017
58	MG798989	Kyrgyzstan	2017
59	KY235829	Uzbekistan	2015
60	KC509858	Russia	2012
61	MK512422	Russia	2015
62	MK228782	Kyrgyzstan	2017
63	MK612495	Russia	2017
64	KX574373	Russia	2015
65	KF374842	Russia	2012
66	KF374834	Russia	2012
67	KC509871	Russia	2012
68	KC509869	Russia	2012
69	KF374820	Russia	2011
70	KF374810	Russia	2011
71	KF374798	Russia	2011
72	KF374769	Russia	2011
73	KF374764	Russia	2011
74	KF374760	Russia	2011
75	KF374727	Russia	2011
76	JX290269	Russia	2010
77	JX290264	Russia	2010
78	JX290259	Russia	2010
79	HQ129983	Russia	2010
80	HQ129982	Russia	2009
81	HQ129980	Russia	2009
82	MK228762	Kyrgyzstan	2017
83	KY235826	Uzbekistan	2015
84	KY235840	Uzbekistan	2015
85	KY235834	Uzbekistan	2015
86	MK228760	Kyrgyzstan	2017
87	MK228746	Kyrgyzstan	2017
88	MH543297	Tajikistan	2017
89	MG799100	Kyrgyzstan	2017
90	MK245566	Tajikistan	2017
91	MW303728	Kyrgyzstan	2019
92	MH543204	Tajikistan	2017
93	MG799109	Kyrgyzstan	2017
94	MH543221	Tajikistan	2017
95	MT452384	Kyrgyzstan	2017
96	KY235809	Uzbekistan	2013
97	KF498473	Kazakhstan	2012
98	MH543155	Tajikistan	2017
99	KY235812	Uzbekistan	2013
100	MK245760	Tajikistan	2017
101	MG799087	Kyrgyzstan	2017
102	KY235837	Uzbekistan	2015
103	JX500703	Russia	2010
104	JX290261	Russia	2010
105	KY235825	Uzbekistan	2015
106	KY235820	Uzbekistan	2015
107	MH666758	Russia	2014
108	MT452361	Kyrgyzstan	2018
109	MK245591	Tajikistan	2017
110	MH543198	Tajikistan	2017
111	KY235814	Uzbekistan	2013
112	KX574386	Russia	2015
113	KF374757	Russia	2011
114	JX500702	Russia	2010
115	KF374778	Russia	2011
116	KC665940	Russia	2012
117	KF374725	Russia	2011
118	KF374791	Russia	2011
119	MG799065	Kyrgyzstan	2017
120	MK228735	Kyrgyzstan	2017
121	MW303670	Kyrgyzstan	2019
122	MG799074	Kyrgyzstan	2017
123	KF374794	Russia	2011
124	KC665920	Russia	2012
125	JX500700	Russia	2010
126	MH543290	Tajikistan	2017
127	MK245734	Tajikistan	2017
128	MH543136	Tajikistan	2017
129	KF374806	Russia	2011
130	MK245568	Tajikistan	2017
131	MG799002	Kyrgyzstan	2017
132	MK228777	Kyrgyzstan	2017
133	KY235819	Uzbekistan	2015
134	MH543209	Tajikistan	2017
135	MG799003	Kyrgyzstan	2017
136	HQ412530	Russia	2008
137	MG799071	Kyrgyzstan	2017
138	MG799113	Kyrgyzstan	2017
139	MK228771	Kyrgyzstan	2017
140	MH543146	Tajikistan	2017
141	MK228739	Kyrgyzstan	2017
142	KY235828	Uzbekistan	2015
143	MK512420	Russia	2016
144	MH543162	Tajikistan	2017
145	MH543211	Tajikistan	2017
146	MH543295	Tajikistan	2017
147	MK245587	Tajikistan	2017
148	KY235818	Uzbekistan	2015
149	MK606615	Russia	2017
150	MG798998	Kyrgyzstan	2017
151	MK612423	Russia	2017
152	KY235822	Uzbekistan	2015
153	KY235831	Uzbekistan	2015
154	MK245758	Tajikistan	2017
155	MH543171	Tajikistan	2017
156	MH543141	Tajikistan	2017
157	KF498465	Kazakhstan	2012
158	KY235808	Uzbekistan	2013
159	MG799060	Kyrgyzstan	2017
160	MK512418	Russia	2015
161	MH543219	Tajikistan	2017
162	MH543168	Tajikistan	2017
163	MH543236	Tajikistan	2017
164	MF143592	Belarus	2014
165	MF143593	Belarus	2014
166	MT452333	Kyrgyzstan	2018
167	KY235830	Uzbekistan	2015
168	MH543124	Tajikistan	2017
169	JX290270	Russia	2009
170	MK245553	Tajikistan	2017
171	MH543231	Tajikistan	2017
172	KF971935	Russia	2012
173	MW303739	Kyrgyzstan	2019
174	MG798986	Kyrgyzstan	2017
175	MH543207	Tajikistan	2017
176	MH543197	Tajikistan	2017
177	MK245752	Tajikistan	2017
178	MK245564	Tajikistan	2017
179	MH543181	Tajikistan	2017
180	MH543247	Tajikistan	2017
181	MH543256	Tajikistan	2017
182	MH543253	Tajikistan	2017
183	MW303659	Kyrgyzstan	2019
184	KY235836	Uzbekistan	2015
185	MH543196	Tajikistan	2017
186	AY845854	Uzbekistan	2002
187	AY845826	Uzbekistan	2002
188	AY845822	Uzbekistan	2002
189	AY845813	Uzbekistan	2002
190	AY845809	Uzbekistan	2002
191	AY845799	Uzbekistan	2002
192	AY845794	Uzbekistan	2002
193	AY845780	Uzbekistan	2002
194	AY845726	Uzbekistan	2002
195	AY845716	Uzbekistan	2002
196	EF576800	Kazakhstan	2003
197	EF576768	Kazakhstan	2003
198	EF576763	Kazakhstan	2003
199	EF576760	Kazakhstan	2003
200	KF874571	Kyrgyzstan	2008
201	KF498467	Kazakhstan	2012
202	KF498468	Kazakhstan	2012
203	KF498469	Kazakhstan	2012
204	KF498471	Kazakhstan	2012
205	KF498474	Kazakhstan	2012
206	KF498475	Kazakhstan	2012
207	MG799014	Kyrgyzstan	2017
208	MW303614	Kyrgyzstan	2019
209	MW303616	Kyrgyzstan	2019
210	MW303617	Kyrgyzstan	2019
211	MH543121	Tajikistan	2017
212	MH543120	Tajikistan	2017
213	MH543117	Tajikistan	2017
214	MH543115	Tajikistan	2017
215	MK245769	Tajikistan	2017
216	MK245749	Tajikistan	2017
217	MK245598	Tajikistan	2017
218	MK245596	Tajikistan	2017
219	MK245594	Tajikistan	2017
220	MK245585	Tajikistan	2017
221	MK245580	Tajikistan	2017
222	MK245558	Tajikistan	2017
223	MK245548	Tajikistan	2017
224	MK245545	Tajikistan	2017
225	MK245543	Tajikistan	2017
226	MK245537	Tajikistan	2017
227	KC254598	Russia	2012
228	KC254586	Russia	2012
229	KC509870	Russia	2012
230	KC509866	Russia	2012
231	KC509857	Russia	2012
232	KC665941	Russia	2012
233	KF177164	Russia	2012
234	KF374815	Russia	2011
235	KF374812	Russia	2011
236	KF374807	Russia	2011
237	KF374805	Russia	2011
238	KF374803	Russia	2011
239	KF374796	Russia	2011
240	KF374788	Russia	2011
241	KF374787	Russia	2011
242	KF374784	Russia	2011
243	KF374777	Russia	2011
244	KF374768	Russia	2011
245	KF374763	Russia	2011
246	KF374747	Russia	2011
247	KF374744	Russia	2011
248	MW484304	Armenia	2017
249	MW484226	Armenia	2018
250	MW484216	Armenia	2017
251	MW484383	Azerbaijan	2017
252	MW484362	Azerbaijan	2017
253	MW484347	Azerbaijan	2017
254	MW484339	Azerbaijan	2017
255	KF498476	Kazakhstan	2012
256	KF498450	Kazakhstan	2013
257	KF374800	Russia	2011
258	KF374802	Russia	2011
259	KF374726	Russia	2011
260	KF374732	Russia	2011
261	KF374733	Russia	2011
262	KF374736	Russia	2011
263	KF374738	Russia	2011
264	KF374750	Russia	2011
265	KF374752	Russia	2011
266	KF374755	Russia	2011
267	KF374758	Russia	2011
268	KF374770	Russia	2011
269	KF374773	Russia	2011
270	KF374711	Russia	2012
271	KF374713	Russia	2012
272	KF374715	Russia	2012
273	KF374716	Russia	2012
274	KF374717	Russia	2012
275	KF374724	Russia	2012
276	KJ197214	Russia	2013
277	KJ197217	Russia	2013
278	KJ197222	Russia	2013
279	KJ197224	Russia	2013
280	MG211539	Russia	2014
281	MG211540	Russia	2014
282	MG211541	Russia	2014
283	MG211542	Russia	2014
284	MG211543	Russia	2014
285	MG211544	Russia	2014
286	MG211545	Russia	2014
287	MG211548	Russia	2015
288	MG211550	Russia	2015
289	MG211551	Russia	2015
290	MG211553	Russia	2015
291	MG211554	Russia	2015
292	MG211558	Russia	2015
293	MG211560	Russia	2015
294	MG211561	Russia	2015
295	MG211565	Russia	2015
296	MG211568	Russia	2015
297	MG211648	Russia	2015
298	MG211572	Russia	2015
299	MG211573	Russia	2015
300	KX574396	Russia	2015
301	KX574363	Russia	2015
302	KX574365	Russia	2015
303	KX574366	Russia	2015
304	KX574369	Russia	2015
305	KX574372	Russia	2015
306	KX574374	Russia	2015
307	KX574378	Russia	2015
308	KX574379	Russia	2015
309	KX574380	Russia	2015
310	KX574382	Russia	2015
311	KX574384	Russia	2016
312	MG211579	Russia	2016
313	MG211580	Russia	2016
314	MG211581	Russia	2016
315	MG211582	Russia	2016
316	MG211589	Russia	2016
317	MG211590	Russia	2016
318	MG211591	Russia	2016
319	MG211620	Russia	2016
320	MG211621	Russia	2016
321	MG211622	Russia	2016
322	MG211629	Russia	2016
323	MG211661	Russia	2016
324	MK002612	Russia	2017
325	MK612460	Russia	2017
326	MK612461	Russia	2017
327	MK612462	Russia	2017
328	MK612483	Russia	2017
329	MK612486	Russia	2017
330	MK612487	Russia	2017
331	MK612491	Russia	2017
332	MK612493	Russia	2017
333	MK002586	Russia	2018
334	MK002587	Russia	2018
335	MK002588	Russia	2018
336	MK002581	Russia	2018
337	MK002583	Russia	2018
338	MN649291	Russia	2019
339	MN649292	Russia	2019
340	MN649294	Russia	2019
341	MN649298	Russia	2019
342	MN649300	Russia	2019
343	MN649303	Russia	2019
344	KY052023	Russia	2016
345	MF497236	Uzbekistan	2015
346	KF374837	Russia	2012
